# Supplementary material
Source: PubMed Central journal article supplement (PMC4041093)
Supplement: NIHMS540419-supplement-01.pdf [file NIHMS540419-supplement-01.pdf]

**Table 4 - Comparison of weighted costs for facility, hospital operating room surgery (except PR and Laser) in different geographic regions. Weighted cost includes cost of re-operations, phacoemulsification of cataract and clinical visits. Representative regions were selected based on variations of the geographic practice cost index.**

|        | Miami, FL           |           | Chicago, IL         |           | Manhattan, NY       |           | San Francisco, CA   |           |
|--------|---------------------|-----------|---------------------|-----------|---------------------|-----------|---------------------|-----------|
|        | Total Weighted Cost | \$ / QALY |
| PR 60% | \$5,901             | \$1,667   | \$5,840             | \$1,650   | \$5,876             | \$1,660   | \$5,975             | \$1,688   |
| PR 75% | \$4,814             | \$1,360   | \$4,764             | \$1,346   | \$4,795             | \$1,355   | \$4,879             | \$1,378   |
| PR 90% | \$3,726             | \$1,053   | \$3,689             | \$1,042   | \$3,715             | \$1,049   | \$3,782             | \$1,068   |
| SB     | \$6,770             | \$1,912   | \$6,689             | \$1,890   | \$6,704             | \$1,894   | \$6,782             | \$1,916   |
| PPV    | \$7,940             | \$2,243   | \$7,855             | \$2,219   | \$7,890             | \$2,229   | \$8,006             | \$2,261   |
| Laser  | \$1,955             | \$362     | \$1,929             | \$357     | \$1,946             | \$360     | \$1,990             | \$368     |

|        | Oklahoma            |           | New Mexico          |           | Alabama             |           | West Virginia       |           |
|--------|---------------------|-----------|---------------------|-----------|---------------------|-----------|---------------------|-----------|
|        | Total Weighted Cost | \$ / QALY |
| PR 60% | \$5,477             | \$1,547   | \$5,562             | \$1,571   | \$5,467             | \$1,544   | \$5,510             | \$1,557   |
| PR 75% | \$4,466             | \$1,262   | \$4,536             | \$1,281   | \$4,458             | \$1,259   | \$4,493             | \$1,269   |
| PR 90% | \$3,455             | \$976     | \$3,510             | \$992     | \$3,449             | \$974     | \$3,475             | \$982     |
| SB     | \$6,292             | \$1,777   | \$6,384             | \$1,803   | \$6,274             | \$1,772   | \$6,338             | \$1,790   |
| PPV    | \$7,382             | \$2,085   | \$7,492             | \$2,116   | \$7,365             | \$2,081   | \$7,430             | \$2,099   |
| Laser  | \$1,772             | \$328     | \$1,808             | \$335     | \$1,767             | \$327     | \$1,786             | \$331     |

All amounts are in United States dollars. PR = pneumatic retinopexy, QALY = quality adjusted life years, 60% = primary procedure success rate of 60%, 75% = primary procedure success rate of 75%, 90% = primary procedure success rate of 90%, SB – scleral buckling, PPV = pars plana vitrectomy.
