# Supplementary material
Source: PubMed Central journal article supplement (PMC4041093)
Supplement: NIHMS540419-supplement-02.pdf [file NIHMS540419-supplement-02.pdf]

**Table 5 - Comparison of weighted costs for non-facility, ASC surgery (except for PR and laser) in different geographic regions. Weighted cost includes cost of re-operations, phacoemulsification of cataract and clinical visits. Representative regions were selected based on variations of the geographic practice cost index.**

|        | Miami, FL           |           | Chicago, IL         |           | Manhattan, NY       |           | San Francisco, CA   |           |
|--------|---------------------|-----------|---------------------|-----------|---------------------|-----------|---------------------|-----------|
|        | Total Weighted Cost | \$ / QALY |
| PR 60% | \$3,565             | \$1,007   | \$3,503             | \$990     | \$3,562             | \$1,006   | \$3,702             | \$1,046   |
| PR 75% | \$2,763             | \$780     | \$2,713             | \$766     | \$2,767             | \$782     | \$2,891             | \$817     |
| PR 90% | \$1,961             | \$554     | \$1,922             | \$543     | \$1,971             | \$557     | \$2,079             | \$587     |
| SB     | \$4,873             | \$1,377   | \$4,792             | \$1,354   | \$4,818             | \$1,361   | \$4,918             | \$1,389   |
| PPV    | \$5,793             | \$1,637   | \$5,708             | \$1,612   | \$5,755             | \$1,626   | \$5,891             | \$1,664   |
| Laser  | \$1,255             | \$232     | \$1,229             | \$228     | \$1,261             | \$234     | \$1,332             | \$247     |

|        | Oklahoma            |           | New Mexico          |           | Alabama             |           | West Virginia       |           |
|--------|---------------------|-----------|---------------------|-----------|---------------------|-----------|---------------------|-----------|
|        | Total Weighted Cost | \$ / QALY |
| PR 60% | \$3,101             | \$876     | \$3,198             | \$904     | \$3,095             | \$874     | \$3,128             | \$884     |
| PR 75% | \$2,375             | \$671     | \$2,457             | \$694     | \$2,371             | \$670     | \$2,396             | \$677     |
| PR 90% | \$1,649             | \$466     | \$1,716             | \$485     | \$1,647             | \$465     | \$1,663             | \$470     |
| SB     | \$4,374             | \$1,236   | \$4,472             | \$1,263   | \$4,359             | \$1,231   | \$4,417             | \$1,248   |
| PPV    | \$5,214             | \$1,473   | \$5,331             | \$1,506   | \$5,200             | \$1,469   | \$5,259             | \$1,486   |
| Laser  | \$1,045             | \$194     | \$1,090             | \$202     | \$1,044             | \$193     | \$1,056             | \$195     |

All amounts are in United States dollars. ASC = ambulatory surgery center, QALY = quality adjusted life years, PR = pneumatic retinopexy, 60% = primary procedure success rate of 60%, 75% = primary procedure success rate of 75%, 90% = primary procedure success rate of 90%, SB – scleral buckling, PPV = pars plana vitrectomy.
